# Supplementary material
Source: PubMed Central journal article supplement (PMC2696193)
Supplement: NIHMS68986-supplement-01.pdf [file NIHMS68986-supplement-01.pdf]

**Molecular Cell, Volume 31**

**Supplemental Data**

**Bypassing Sir2 and O-Acetyl-ADP-Ribose in Transcriptional Silencing**

**Chia-Ching Chou, Yao-Cheng Li, and Marc R. Gartenberg**

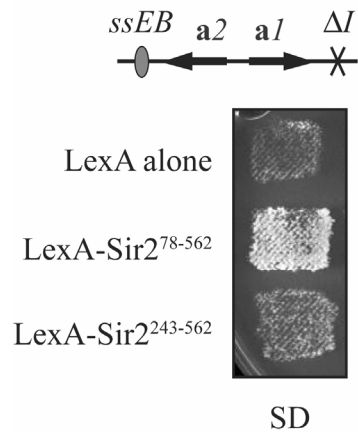

**Figure S1** – LexA-Sir2<sup>243-562</sup> does not impart targeted silencing. Previous work showed that tethering Sir proteins to DNA can nucleate silent chromatin, which spreads and represses nearby genes (Chien et al., 1993; Cuperus et al., 2000; Cockell et al., 2000). Strain YCL73 (*MAT $\alpha$   $\Delta$ hmr::6lex<sup>ops</sup> ssEB-a2a1  $\Delta$ sir2  $\Delta$ sir1*) with LexA operators (*lex<sup>ops</sup>*) at a synthetic *HMR-E* silencer (labeled *ssEB*, (Li et al., 2001)) was patch mated with the K125 tester strain. The strain was transformed with plasmids that express Sir2<sup>243-562</sup> (pCC18), LexA fused to either Sir2<sup>78-562</sup> (pCC27), or LexA alone (pJK1521). LexA-Sir2<sup>78-562</sup> produced robust targeted silencing (also see figure 3C). LexA-Sir2<sup>243-562</sup> and LexA alone did not silence at all.

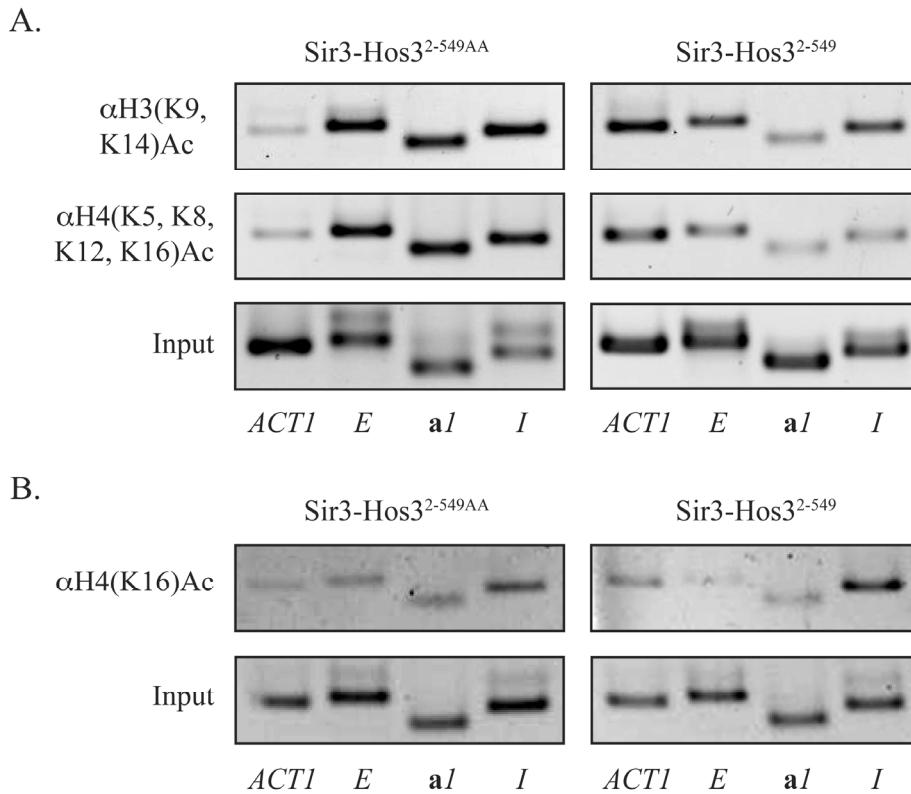

**Figure S2** – Representative examples of raw ChIP data. Extracts were prepared from the strains described in Figure 4. **A)** PCR reactions of Input and samples immunoprecipitated with either anti-H3(K9, K14)Ac or anti-H4(K5, K8, K12, K16)Ac. **B)** PCR reactions of Input and samples immunoprecipitated with anti-H4K16Ac.

**Table S1. Strains**

| Name    | Genotype                                                                                                                       | Reference                    |
|---------|--------------------------------------------------------------------------------------------------------------------------------|------------------------------|
| K125    | <i>MATa hom3</i>                                                                                                               | (Tatchell et al., 1981)      |
| K126    | <i>MATα hom3 ilv1</i>                                                                                                          | “”                           |
| YCB496  | <i>MATα ura3-52 his3Δ200 leu2Δ1 trp1Δ63 ade2-101 lys2-801 hst1Δ2::LEU2 hst2Δ1::TRP1 hst3Δ3::HIS3 hst4Δ1::URA3 sir2Δ1::URA3</i> | (Brachmann et al., 1995)     |
| W303-1A | <i>MATa ade2-1 can1-100 his3-11,15 leu2-3,112 trp1-1 ura3-1</i>                                                                | (Thomas and Rothstein, 1989) |
| GCY16   | W303-1A <i>Δsir2::kanMX</i>                                                                                                    | (Cuperus et al., 2000)       |
| YCL73   | W303-1A <i>MATα hmr::RS-6lex<sup>ops</sup> ssEB-a2a1-RS Δlys2 Δsir2::klURA3 Δsir1::loxP-kanMX-loxP Δbar1::hisG</i>             | (Li et al., 2001)            |
| YDS631  | W303-1A <i>MATα adh4::URA3::C<sub>1-3A</sub></i>                                                                               | (Chien et al., 1993)         |
| GA2050  | W303-1A <i>MATα Aeb4lex<sup>ops</sup>::TRP1::HMR-I</i>                                                                         | (Taddei et al., 2004)        |
| JN19    | GA2050 <i>Aeb4lex<sup>ops</sup>::klURA3::HMR-I</i>                                                                             | This study                   |
| CCC1    | YDS631 <i>MATα Δsir2::kanMX</i>                                                                                                | “”                           |
| CCC8    | GCY16 <i>MATa Δsir2::kanMX Δsir3::HIS3</i>                                                                                     | “”                           |
| CCC11   | YDS631 <i>Δsir3::HIS3</i>                                                                                                      | “”                           |
| CCC12   | YDS631 <i>MATα Δsir2::kanMX Δsir3::HIS3</i>                                                                                    | “”                           |
| CCC18   | GCY16 <i>MATa Δsir2::hphMX Δsir3::HIS3</i>                                                                                     | “”                           |
| CCC19   | YDS631 <i>MATα Δsir2::hphMX Δsir3::HIS3</i>                                                                                    | “”                           |
| CCC20   | GCY16 <i>MATa Δsir2::kanMX Δsir3::HIS3 Δsir4::hphMX</i>                                                                        | “”                           |
| CCC21   | YDS631 <i>MATα Δsir2::kanMX Δsir3::HIS3 Δsir4::hphMX</i>                                                                       | “”                           |
| CCC37   | YDS631 <i>MATα Δsir2::hphMX Δsir3::HIS3 Δhst2::kanMX</i>                                                                       | “”                           |
| CCC38   | GCY16 <i>MATa Δsir2::hphMX Δsir3::HIS3 Δhst2::kanMX</i>                                                                        | “”                           |
| CCC44   | JN19 <i>Δsir2::hphMX</i>                                                                                                       | “”                           |
| CCC45   | GCY16 <i>MATa Δsir2::hphMX Δsir3::HIS3 Δhst1::kanMX</i>                                                                        | “”                           |
| CCC46   | YDS631 <i>MATα Δsir2::hphMX Δsir3::HIS3 Δhst1::kanMX</i>                                                                       | “”                           |
| CCC48   | <i>MATα Δsir2::hphMX Δsir3::HIS3 Δhst1::kanMX</i>                                                                              | “”                           |
| CCC50   | CCC48 <i>MATα Δsir2::hphMX Δsir3::HIS3 Δhst1::kanMX Δhst2::loxP-klURA3-loxP</i>                                                | “”                           |

All strains were derived from W303-1A, except K125 and K126 and the S288C-derived strain YCB496.

**Table S2.** Expression vectors

| Name                     | Marker      | Description                                                                  | Primers <sup>†</sup> | Construction                                                                                                                                                                                                             |
|--------------------------|-------------|------------------------------------------------------------------------------|----------------------|--------------------------------------------------------------------------------------------------------------------------------------------------------------------------------------------------------------------------|
| pSIR3-HA <sup>TRP1</sup> | <i>TRP1</i> | Sir3 <sup>3xHA</sup>                                                         | -                    | <i>TRP1</i> version of pSIR3-HA (Ansari and Gartenberg, 1999).                                                                                                                                                           |
| pBTM116 <sup>#</sup>     | <i>TRP1</i> | LexA                                                                         | -                    | (Bartel and Fields, 1995)                                                                                                                                                                                                |
| pGLC117 <sup>#</sup>     | <i>TRP1</i> | LexA-Sir2 <sup>78-562</sup>                                                  | -                    | (Cuperus et al., 2000)                                                                                                                                                                                                   |
| pJK1521 <sup>#</sup>     | <i>TRP1</i> | LexA alone                                                                   | -                    | (Kamens et al., 1990)                                                                                                                                                                                                    |
| pCC1                     | <i>TRP1</i> | Sir3-Sir2 <sup>2-562</sup>                                                   | 1, 2                 | Terminal 3xHA epitopes of pSIR3-HA <sup>TRP1</sup> were replaced with Sir2 <sup>2-562</sup> by P-MPGR <sup>†</sup> using pSir2-YIp5 (Shore et al., 1984) as template.                                                    |
| pCC4                     | <i>TRP1</i> | Sir3-Sir2 <sup>243-562</sup>                                                 | 2, 3                 | Terminal Sir3 <sup>3xHA</sup> epitopes of pSIR3-HA <sup>TRP1</sup> were replaced with Sir2 <sup>243-562</sup> by P-MPGR.                                                                                                 |
| pCC7*                    | <i>TRP1</i> | Sir2                                                                         | 4, 5, 6 <sup>‡</sup> | SIR3 <sup>1-966</sup> was removed from pCC1 by O-MPGR.                                                                                                                                                                   |
| pCC8*                    | <i>TRP1</i> | Sir2 <sup>243-562</sup>                                                      | 4, 5, 6 <sup>‡</sup> | Sir3-Sir2 <sup>2-242</sup> portion of pCC1 was removed by O-MPGR <sup>†</sup> .                                                                                                                                          |
| pCC10                    | <i>TRP1</i> | Sir3-Hos3 <sup>2-549</sup>                                                   | 7, 8                 | Terminal Sir3 <sup>3xHA</sup> epitopes of pSIR3-HA <sup>TRP1</sup> were replaced with Hos3 <sup>2-549</sup> by P-MPGR using genomic W303-1A DNA as template. A PCR error created a premature stop codon at position 550. |
| pCC11                    | <i>TRP1</i> | Sir3-Hos3 <sup>2-549AA</sup>                                                 | 9, 12                | Active site residues of Hos3 <sup>2-549</sup> (H235, H236) in pCC10 were mutated to alanine by O-MPGR.                                                                                                                   |
| pCC18                    | <i>TRP1</i> | LexA-Sir2 <sup>243-562</sup>                                                 | 13, 14               | The Sir3-Sir2 <sup>2-242</sup> portion of pCC4 was replaced with LexA by P-MPGR using pBTM116 as a template.                                                                                                             |
| pCC21*                   | <i>TRP1</i> | Hos3 <sup>1-549</sup>                                                        | 4, 9                 | The Sir3 portion of pCC10 was removed by O-MPGR.                                                                                                                                                                         |
| pCC27                    | <i>TRP1</i> | LexA-Sir2 <sup>78-562</sup>                                                  | 13, 29               | Sir3-Sir2 <sup>2-77</sup> portion of pCC1 was replaced with LexA by P-MPGR.                                                                                                                                              |
| pCC29 <sup>#</sup>       | <i>TRP1</i> | LexA-Sir <sup>78-252</sup> -Hos3 <sup>2-549</sup> -Sir2 <sup>522-562</sup>   | 25, 26               | The Sir2 <sup>253-521</sup> portion of pGLC117 was replaced with Hos3 <sup>2-549</sup> by P-MPGR.                                                                                                                        |
| pCC30 <sup>#</sup>       | <i>TRP1</i> | LexA-Sir <sup>78-252</sup> -Hos3 <sup>2-549AA</sup> -Sir2 <sup>522-562</sup> | 25, 26               | The Sir2 <sup>253-521</sup> portion of pGLC117 was replaced with Hos3 <sup>2-549AA</sup> by P-MPGR.                                                                                                                      |
| pCC31                    | <i>ADE2</i> | Sir3-Hos3 <sup>2-549</sup>                                                   | 27, 28               | The <i>TRP1</i> ORF of pCC10 was replaced with the <i>ADE2</i> ORF by P-MPGR using pM3938 (Voth et al., 2003) as template.                                                                                               |
| pCC32                    | <i>ADE2</i> | Sir2                                                                         | 27, 28               | The <i>TRP1</i> ORF of pCC7 was replaced with the <i>ADE2</i> ORF by P-MPGR.                                                                                                                                             |
| pCC33                    | <i>ADE2</i> | Sir3-Hos3 <sup>2-549AA</sup>                                                 | 27, 28               | The <i>TRP1</i> ORF of pCC11 was replaced with the <i>ADE2</i> ORF by P-MPGR.                                                                                                                                            |

<sup>†</sup> Primers (listed in table S3) were used in either P-MPGR (PCR-Mediated Plasmid Gap Repair) or O-MPGR (Oligonucleotide-Mediated Plasmid Gap Repair) to construct the respective clones.

\* The expression construct contains a leader peptide consisting of the last 12 amino acids of Sir3 (Sir3<sup>967-978</sup>) inserted behind the initiating methionine codon.

# The expression construct is transcribed from the *ADHI* promoter.

‡ Reaction contained three overlapping primers to make an extended polynucleotide product.

**Table S3.** Oligonucleotides for strain and plasmid construction, ChIP and RT-PCR.

| #  | Name                       | Sequence                                                                         |
|----|----------------------------|----------------------------------------------------------------------------------|
| 1  | <i>Sir3Sir2_1</i>          | 5'-taaattacgcattttcgatggatgaagaattcaaaaatggactgcattACCATCCCACATATGAAATACG-3'     |
| 2  | <i>Sir3Sir2_2</i>          | 5'-gcatgtgtacatagcatatttatggcggaagtgaaaatgaatggtggtgTTAGAGGGTTTTGGGATGTTC-3'     |
| 3  | <i>Sir3HDAc_1</i>          | 5'-tacgcattttcgatggatgaagaattcaaaaatggactgcattACTATTGATCATTTTATTCAAAAATTACAT-3'  |
| 4  | <i>Sir3 splicing oligo</i> | 5'-aaagttgtttgttctaacaattggattagctaaaatgTCGATGGATGAAGAATTCAAAAATATGGACTGCATT5-3' |
| 5  | <i>Sir3 splicing_1</i>     | 5'-cccttcacaccttccttacagaggtttaagAAAGTTGTTTTGTTCTAACAATTGG-3'                    |
| 6  | <i>Sir3 splicing_2</i>     | 5'-gtcttgatacggcgatttcacatgtgggatggtAATGCAGTCCATATTTTTGAATTC-3'                  |
| 7  | <i>Sir3Hos3_1</i>          | 5'-taaattacgcattttcgatggatgaagaattcaaaaatggactgcattTCTTCCAAGCATTTCAGATCC-3'      |
| 8  | <i>Sir3Hos3_2</i>          | 5'-gcatgtgtacatagcatatttatggcggaagtgaaaatgaatggtggtTCACCATCTTCCACCACTTC-3'       |
| 9  | <i>Hos3-r1900int</i>       | 5'-AGCTCATGGTCTGAATCTTC-3'                                                       |
| 12 | <i>Hos3HH235AA</i>         | 5'-acgcatgtgtcgtgcttgatttcgatctaGCCGCCggCgatgggacccaagacatttctggaaaactgcggt-3'   |
| 13 | <i>LexAdsir3chimera_F</i>  | 5'-agttgtttgttetaacaattggattagctaaaATGAAAGCGTTAACGGCC-3'                         |
| 14 | <i>LexAdsir3chimera_R</i>  | 5'-aatgcagtcataattttgaattctcatccatcgaCGGGAATTCCAGCCAGTC-3'                       |
| 17 | <i>HMR-E/5</i>             | 5'-CGCATTCTTTTTCGTCCACATTTGC-3'                                                  |
| 18 | <i>HMR-E/3</i>             | 5'-GATTAAGCTCATAACTTGGACGGG-3'                                                   |
| 19 | <i>A1/5</i>                | 5'-ATGGATGATATTTGTAGTATGGCG-3'                                                   |
| 20 | <i>A1/3</i>                | 5'-GGTGGTATATTTCTAACCTATTGTTAG-3'                                                |
| 21 | <i>HMR-I/5</i>             | 5'-GAAGAGACTTATGATCAACATAATTTTGC-3'                                              |
| 22 | <i>HMR-I/3</i>             | 5'-CATTTTCTTGTGCAAATTCCAA-3'                                                     |
| 23 | <i>ACT1/5</i>              | 5'-CTTCCACGTCCTCTTGCAT-3'                                                        |
| 24 | <i>ACT1/3</i>              | 5'-GCGTGAAAAATCTAAAAGCTGATG-3'                                                   |
| 25 | <i>sir2hos3_1</i>          | 5'-AATTTTTTCACTATTGATCATTTTATTCAAAAATTACATTCTTCCAAGCATTTCAGATCC-3'               |
| 26 | <i>Nsir2hos3tsir2c-2</i>   | 5'-CCATTTCTTATGCGGAATCGTCCAGCCACATTTTTGCTGTTTTTCCGTGCTTCTCGG-3'                  |
| 27 | <i>TRP1ORF_1</i>           | 5'-ATGTCTGTTATTAATTTACACAG-3'                                                    |
| 28 | <i>TRP1ORF_2</i>           | 5'-CTATTTCTTAGCATTTTTG-3'                                                        |
| 29 | <i>SIR2-int-nc-r</i>       | 5'-AGCGGTATGTAATTTTTG-3'                                                         |
| 30 | <i>YFR057W-f</i>           | 5'-CTAGTGTCTATAGTAAGTGCTCGG-3'                                                   |
| 31 | <i>YFR057W-r</i>           | 5'-GGTATATTGCCACGCAAAGAAAGG-3'                                                   |
| 32 | <i>KCC4-f</i>              | 5'-TTGGTGAAACACTGGGCTTT-3'                                                       |
| 33 | <i>KCC4-r</i>              | 5'-GGCGTATTCCAGGATAAGGTA-3'                                                      |

## Supplemental Reference List

Ansari, A., and Gartenberg, M.R. (1999). Persistence of an alternate chromatin structure at silenced loci *in vitro*. *Proc. Natl. Acad. Sci. USA* *96*, 343-348.

Bartel, P.L., and Fields, S. (1995). Analyzing protein-protein interactions using two-hybrid system. *Methods Enzymol.* *254*, 241-263.

Brachmann, C.B., Sherman, J.M., Devine, S.E., Cameron, E.E., Pillus, L., and Boeke, J.D. (1995). The *SIR2* gene family, conserved from bacteria to humans, functions in silencing, cell cycle progression, and chromosome stability. *Genes Dev.* *9*, 2888-2902.

Chien, C.-T., Buck, S., Sternglanz, R., and Shore, D. (1993). Targeting of SIR1 protein establishes transcriptional silencing at HM loci and telomeres in yeast. *Cell* *75*, 531-541.

Cockell, M.M., Perrod, S., and Gasser, S.M. (2000). Analysis of Sir2p domains required for *rDNA* and telomeric silencing in *Saccharomyces cerevisiae*. *Genetics* *154*, 1069-1083.

Cuperus, G., Shafaatian, R., and Shore, D. (2000). Locus specificity determinants in the multifunctional yeast silencing protein Sir2. *EMBO J.* *19*, 2641-2651.

Kamens, J., Richardson, P., Mosialos, G., Brent, R., and Gilmore, T. (1990). Oncogenic transformation by vrel requires an amino-terminal activation domain. *Mol. Cell. Biol.* *10*, 2840-2847.

Li, Y.-C., Cheng, T.-H., and Gartenberg, M.R. (2001). Establishment of transcriptional silencing in the absence of DNA replication. *Science* *291*, 650-653.

Shore, D., Squire, M., and Nasmyth, K.A. (1984). Characterization of two genes required for the position-effect control of yeast mating-type genes. *EMBO J.* *3*, 2817-2823.

Taddei, A., Hediger, F., Neumann, F.R., Bauer, C., and Gasser, S.M. (2004). Separation of silencing from perinuclear anchoring functions in yeast Ku80, Sir4 and Esc1 proteins. *EMBO J.* *23*, 1301-1312.

Tatchell, K., Nasmyth, K.A., Nall, B.D., Astell, C., and Smith, M. (1981). In vitro mutation analysis of the mating type locus in yeast. *Cell* *27*, 25-35.

Thomas, B.J., and Rothstein, R. (1989). Elevated recombination rates in transcriptionally active DNA. *Cell* *56*, 619-630.

Voth, W.P., Jiang, Y.W., and Stillman, D.J. (2003). New 'marker swap' plasmids for converting selectable markers on budding yeast gene disruptions and plasmids. *Yeast* *20*, 985-993.
